# Supplementary material
Source: PubMed Central journal article supplement (PMC4365995)
Supplement: NIHMS664912-supplement-Supplemental_Fig_3.pdf [file NIHMS664912-supplement-Supplemental_Fig_3.pdf]

### Supplemental digital content 3.

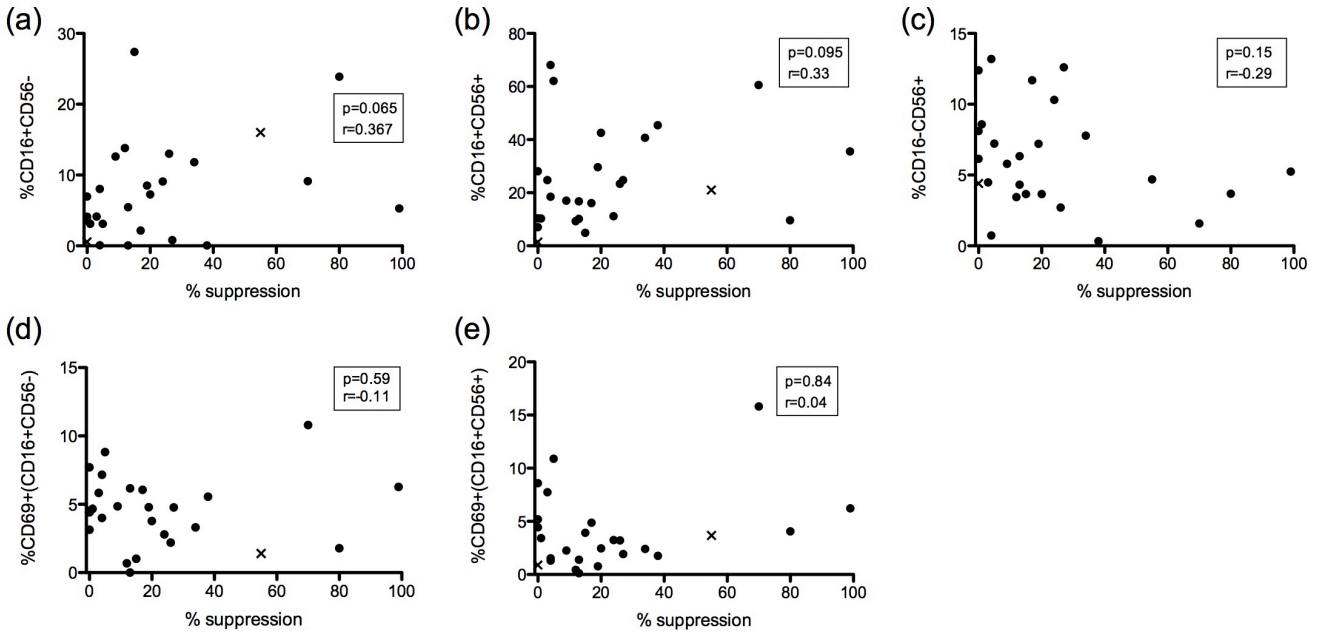

**Supplemental digital content 3. Viral suppressive capacity of cord blood NK cells.** NK cells were assessed for their ability to suppress HIV replication in autologous CD4+ T cells. Suppressive capacity was subsequently correlated with NK cell subset proportions and activation marker (CD69) expression. The percentage of CD16+CD56- (a), CD16+CD56+ (b), CD16-CD56+ (c) NK cells as well as the percentage of CD69+ cells found within CD16+CD56- (d) and CD16+CD56+ NK cell subsets (e) are presented against the percent NK cell suppression of HIV-1 replication. Each point represents the average suppressive capacity of NK cells from each cord blood sample's replicates. Solid dots represent infants that remained HIV-uninfected while x's represent infants that subsequently became HIV-1 infected (N=26). Statistics were generated using a Spearman correlation.
