# Supplementary material
Source: PubMed Central journal article supplement (PMC4365995)
Supplement: NIHMS664912-supplement-Supplemental_Fig_4.pdf [file NIHMS664912-supplement-Supplemental_Fig_4.pdf]

## Supplemental digital content 4.

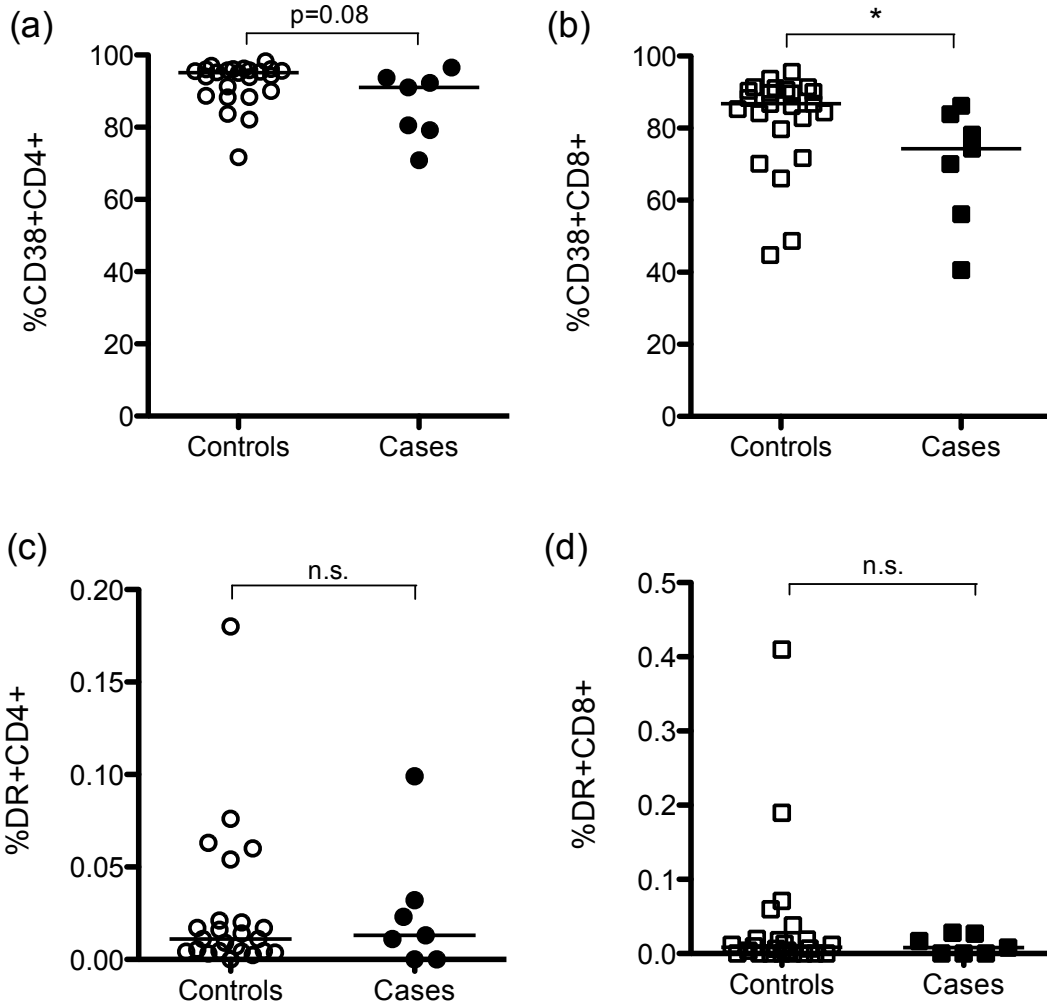

**Supplemental digital content 4. CD38 and HLA-DR single-expression on CD4+ and CD8+ T cells in CBMC by subsequent HIV-1 acquisition.** CD4+ or CD8+ lymphocytes were assessed for activation and maturation status by expression of CD38 (a. CD4+, b. CD8+), and HLA-DR (c. CD4+, d. CD8+). Lines represent medians for each group, and statistics were generated using a Mann-Whitney test (\* $p < 0.05$ , n.s.  $p > 0.1$ ).
